# Supplementary material for: Synthesis of a porous birnessite manganese dioxide hierarchical structure using thermally reduced graphene oxide paper as a sacrificing template for supercapacitor application
Source: Royal Society of Chemistry journal article supplement (doi:10.1039/c2nj21052e), 2012-01-01
Supplement: c2nj21052e.pdf [file c2nj21052e.pdf]

**Synthesis of porous birnessite manganese dioxide hierarchical  
structure using thermally reduced graphene oxide paper as a  
sacrificing template for supercapacitor application**

Zhangpeng Li<sup>a, b</sup>, Jinqing Wang<sup>a, \*</sup>, Zhaofeng Wang<sup>a</sup>, Haiqiong Ran<sup>c</sup>, Yang Li<sup>c</sup>,  
Xiuxun Han<sup>a, \*</sup>, and Shengrong Yang<sup>a</sup>

<sup>a</sup> State Key Laboratory of Solid Lubrication, Lanzhou Institute of Chemical Physics,  
Chinese Academy of Sciences, Lanzhou 730000, P. R. China

<sup>b</sup> Graduate University of Chinese Academy of Sciences, Beijing 100080, P. R. China

<sup>c</sup> School of Stomatology, Lanzhou University, Lanzhou 730000, P. R. China

\* Corresponding authors:

[jqwang@licp.cas.cn](mailto:jqwang@licp.cas.cn) (J. Wang); [xxhan@licp.cas.cn](mailto:xxhan@licp.cas.cn) (X. Han)

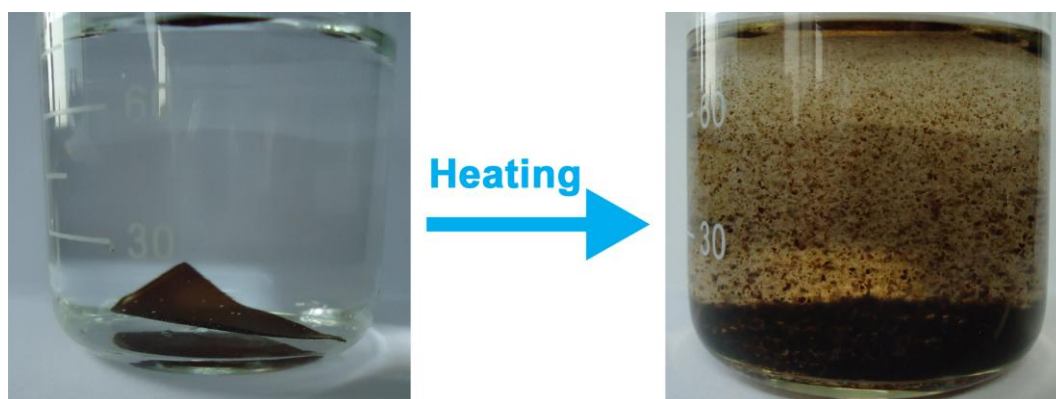

**Fig. S1** Photographs of GO papers being immersed in water (left) and boiling water for 20 min (right), indicating the GO paper will be redispersed well in water under the poignant condition.

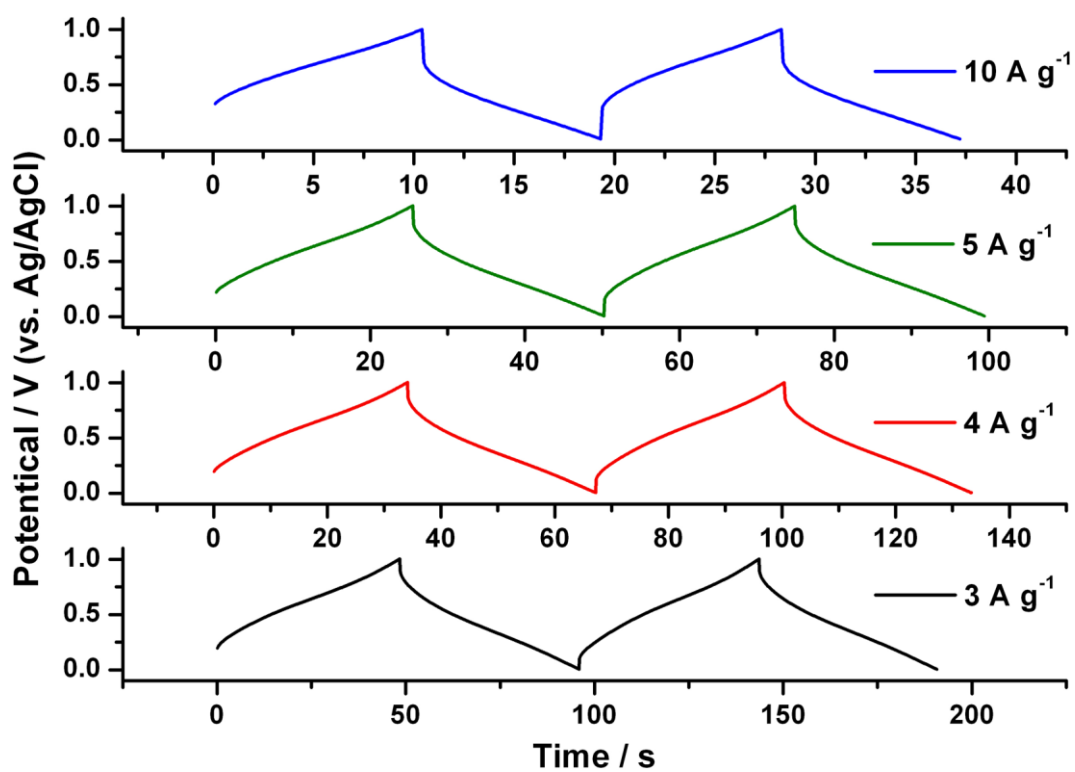

**Fig. S2** Charge-discharge behaviors of the pMHs electrode at different current densities.

**Table S1 Specific capacitance values of different graphene-based materials for supercapacitors**

| Electrode material                       | Specific capacitance                           | Power density              | Reference |
|------------------------------------------|------------------------------------------------|----------------------------|-----------|
| MnO <sub>2</sub> /graphene composite     | 324 F g <sup>-1</sup> @ 10 mV s <sup>-1</sup>  |                            | S1        |
|                                          | 325 F g <sup>-1</sup> @ 1 A g <sup>-1</sup>    |                            |           |
| Functionalized graphene/MnO <sub>2</sub> | 188 F g <sup>-1</sup> @ 0.25 A g <sup>-1</sup> |                            | S2        |
|                                          | 168 F g <sup>-1</sup> @ 1 A g <sup>-1</sup>    |                            |           |
| Graphene/MnO <sub>2</sub>                | 315 F g <sup>-1</sup> @ 2 mV s <sup>-1</sup>   | 110 kW kg <sup>-1</sup>    | S3        |
| MnO <sub>2</sub> nanowire/graphene       | 31 F g <sup>-1</sup> @ 0.5 A g <sup>-1</sup>   | 5000 W kg <sup>-1</sup> at | S4        |
|                                          |                                                | 7.0 Wh kg <sup>-1</sup>    |           |
| Graphene oxide/MnO <sub>2</sub>          | 216 F g <sup>-1</sup> @ 0.15 A g <sup>-1</sup> |                            | S5        |
|                                          | 111.1 F g <sup>-1</sup> @ 1 A g <sup>-1</sup>  |                            |           |
| Graphene/MnO <sub>2</sub> nanosheet      | 188 F g <sup>-1</sup> @ 0.25 A g <sup>-1</sup> |                            | S6        |
|                                          | 113.5 F g <sup>-1</sup> @ 1 mV s <sup>-1</sup> |                            |           |
| MnO <sub>2</sub> nanofibre               | 167 F g <sup>-1</sup> @ 2.5 mA                 |                            | S8        |
|                                          |                                                | spheres                    |           |
| Nanostructured MnO <sub>2</sub> pMHs     | 168 F g <sup>-1</sup> @ 1 mV s <sup>-1</sup>   |                            | S9        |
|                                          | 194 F g <sup>-1</sup> @ 0.1 A g <sup>-1</sup>  |                            |           |
|                                          | 154 F g <sup>-1</sup> @ 2 A g <sup>-1</sup>    |                            | this work |

## References

- S1. Y. Qian, S. Lu and F. Gao, *J. Mater. Sci.*, 2011, 46, 3517–3522.
- S2. J. Zhang, J. Jiang and X. S. Zhao, *J. Phys. Chem. C*, 2011, 115, 6448–6454.
- S3. G. Yu, L. Hu, M. Vosgueritchian, H. Wang, X. Xie, J. R. McDonough, X. Cui, Y. Cui and Z. Bao, *Nano Lett.*, 2011, 11, 2905–2911.
- S4. Z. S. Wu, W. Ren, D. W. Wang, F. Li, B. Liu and H. M. Cheng, *ACS Nano*, 2010, 4, 5835–5842.
- S5. S. Chen, J. Zhu, X. Wu, Q. Han and X. Wang, *ACS Nano*, 2010, 4, 2822–2830.
- S6. J. Zhang, J. Jiang and X.S. Zhao, *J. Phys. Chem. C*, 2011, 115, 6448–6454.
- S7. Z. Fan, J. Yan, T. Wei, L. Zhi, G. Ning, T. Li and F. Wei, *Adv. Funct. Mater.*, 2011, 21, 2366–2375.
- S8. M. Xu, L. Kong, W. Zhou and Hulin Li, *J. Phys. Chem. C* 2007, 111, 19141–19147.
- S9. V. Subramanian, Hongwei Zhu and Bingqing Wei, *J. Power Sources*, 2006, 159, 361–364.
